# Supplementary material
Source: PubMed Central journal article supplement (PMC2923682)

# Supplementary Figure S4

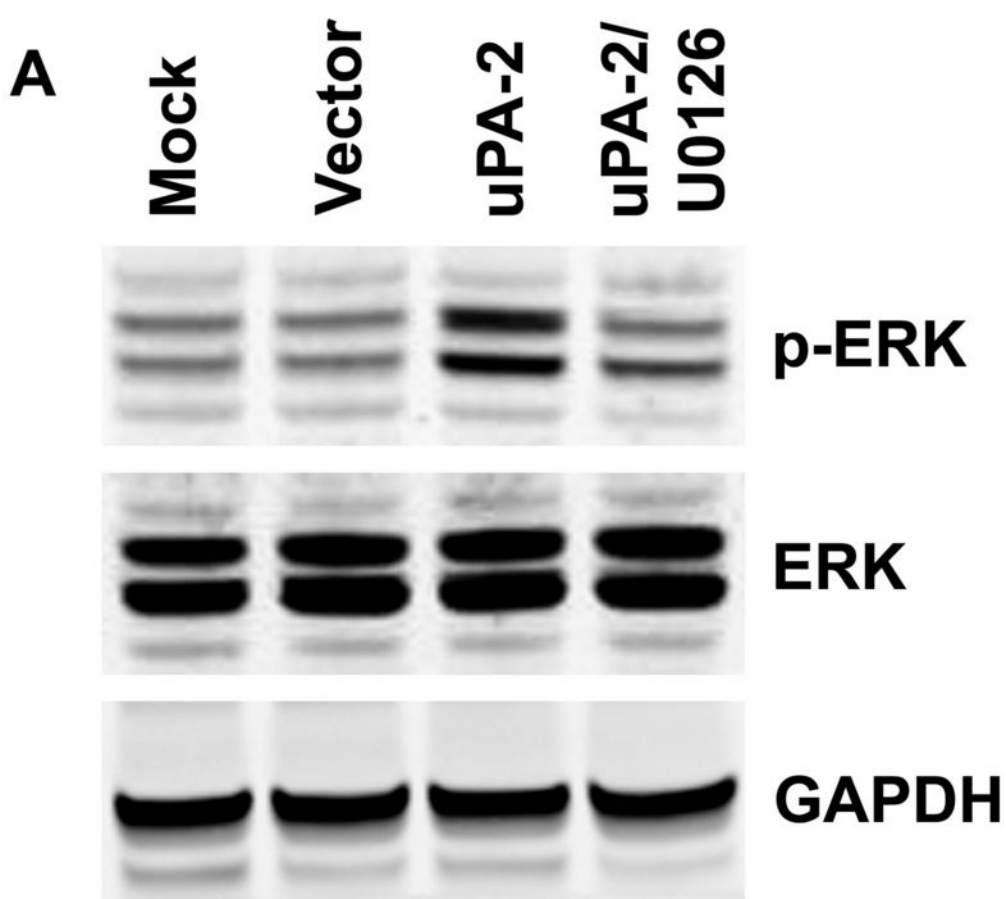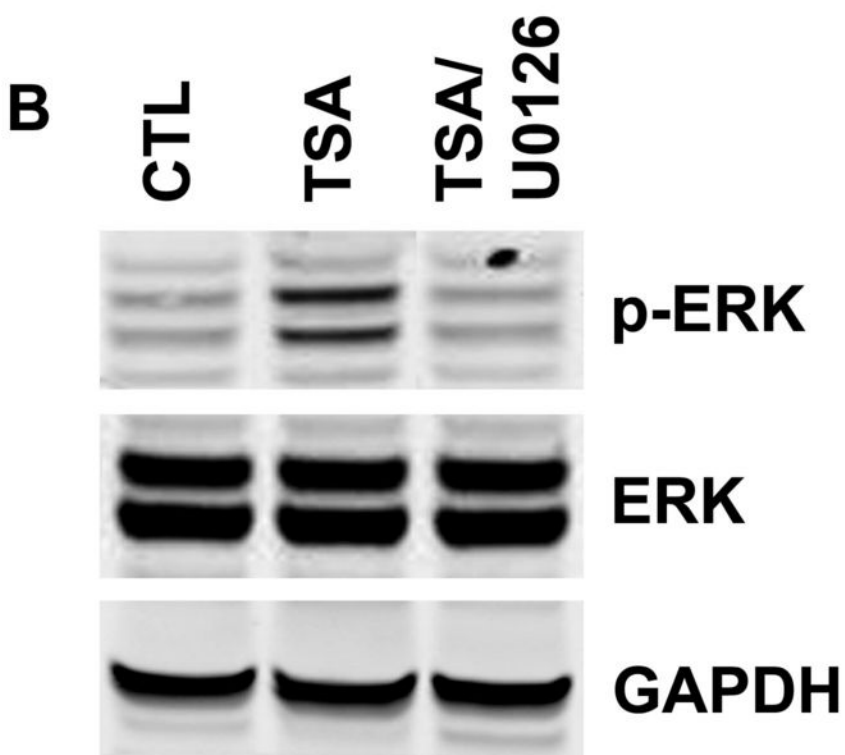

Supplement: NIHMS214321-supplement-10.pdf [file NIHMS214321-supplement-10.pdf]

# Supplementary Figure S1

**A**

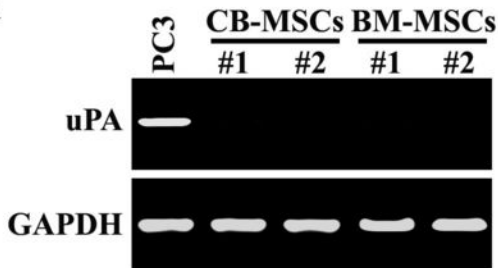

**B**

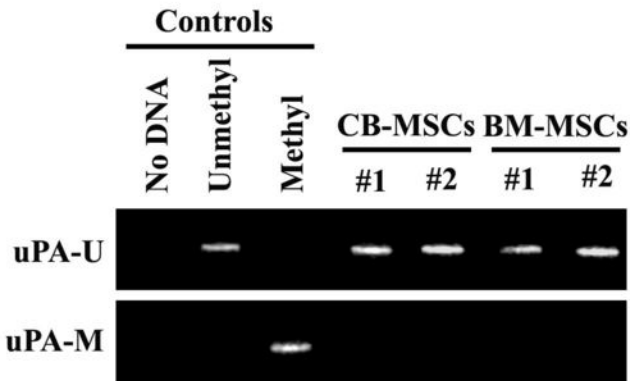

Supplement: NIHMS214321-supplement-7.pdf [file NIHMS214321-supplement-7.pdf]

# Supplementary Figure S2

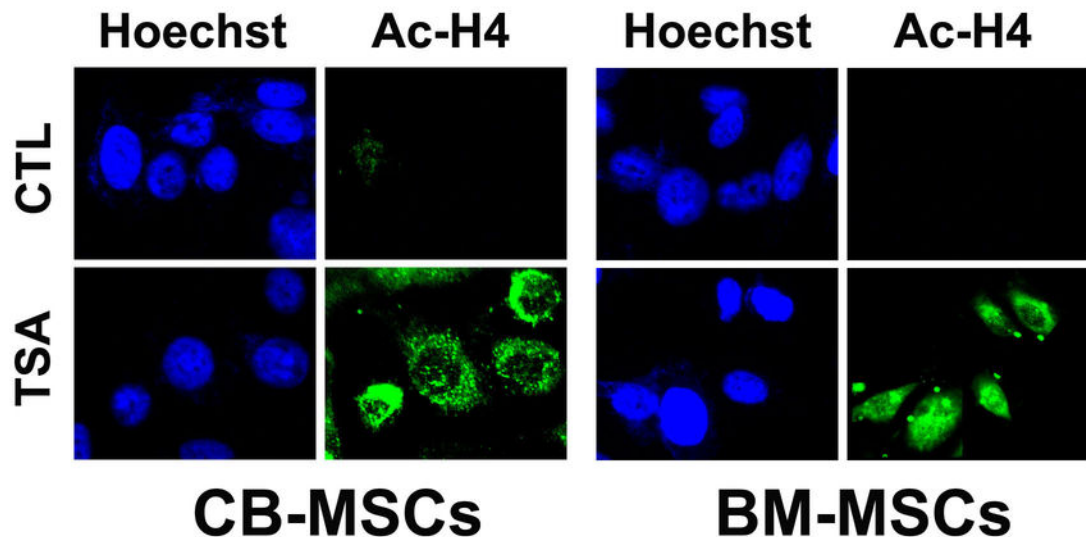

Supplement: NIHMS214321-supplement-8.pdf [file NIHMS214321-supplement-8.pdf]

# Supplementary Figure S3

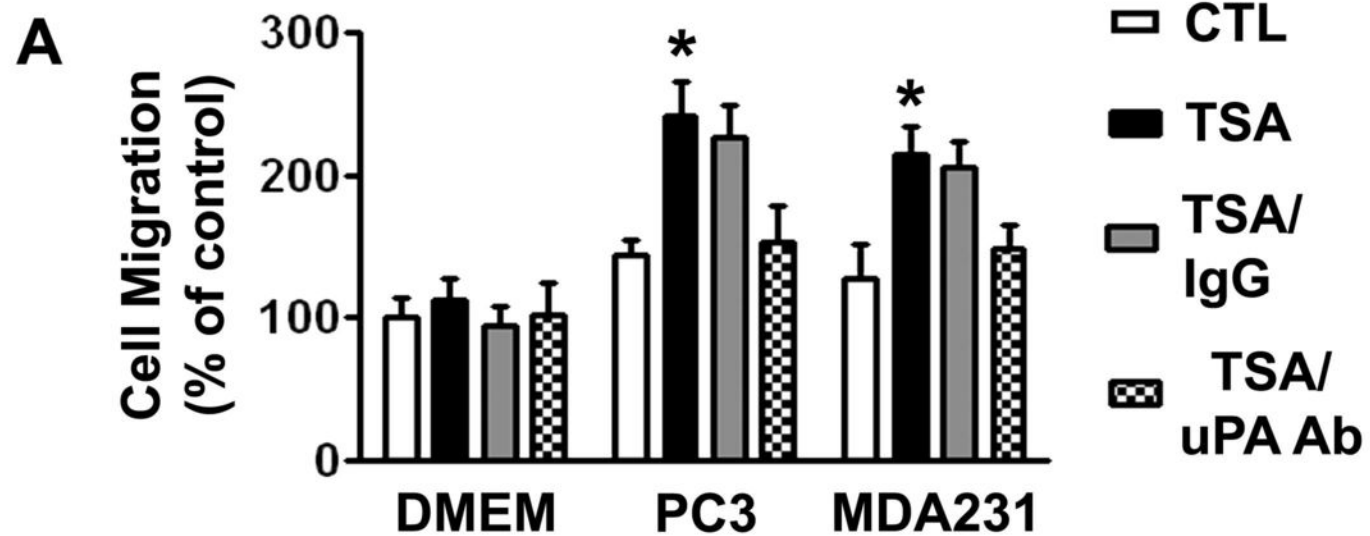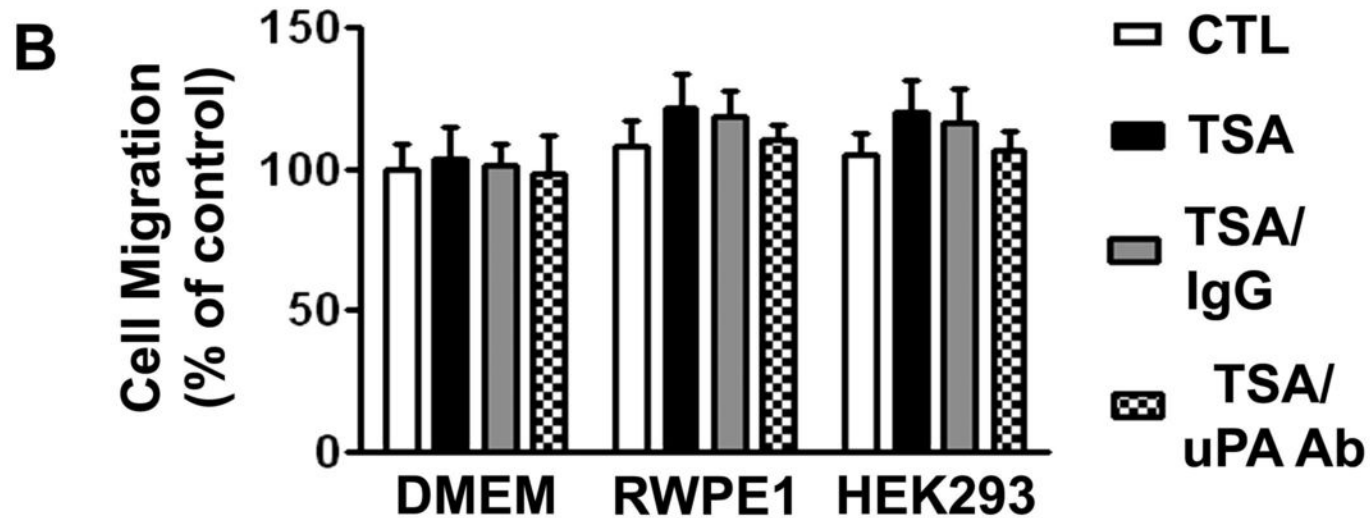

Supplement: NIHMS214321-supplement-9.pdf [file NIHMS214321-supplement-9.pdf]
